# Supplementary material for: Trifluoromethyl functionalized polyindoles: electrosynthesis, characterization, and improved capacitive performance
Source: Royal Society of Chemistry journal article supplement (doi:10.1039/d0nj00812e), 2020-01-01
Supplement: d0nj00812e1.pdf [file d0nj00812e1.pdf]

## Supporting Information

### **Trifluoromethyl functionalized polyindoles: Electrosyntheses, characterization, and improved capacitive performance**

Rui Wang<sup>a,b</sup>, Yu Xue<sup>a</sup>, Fengxing Jiang<sup>a</sup>, Weiqiang Zhou<sup>\*,a,b</sup>, Jingkun Xu<sup>\*,a,c</sup>, Xuemin Duan<sup>a</sup>, Danhua Zhu<sup>a</sup>, Liming Xu<sup>a</sup>, Yue Cai<sup>a</sup>, Aiqin Liang<sup>a</sup>

<sup>a</sup> *Flexible Electronics Innovation Institute (FEII), Jiangxi Science and Technology Normal University, Nanchang 330013, PR China*

<sup>b</sup> *Jiangxi Engineering Laboratory of Waterborne Coatings, Jiangxi Science and Technology Normal University, Nanchang 330013, PR China*

<sup>c</sup> *College of Chemistry and Molecular Engineering, Qingdao University of Science and Technology, Qingdao 266042, PR China*

\* Corresponding author: Fax: +86-791-83823320, Tel.: +86-791-88537967, E-mail: zhouwqh@163.com; xujingkun@tsinghua.org.cn.

#### **1. Calculation of the polymer mass**

To obtain the accurate mass of each polymer material, the current efficiency ( $\eta$ ) of polymerization (i.e., the charge consumed by growth of the polymer film with respect to the total charge passed through the cell) was measured along with the weight ( $W_p$ ) of the polymer (in the de-doped state) deposited on the electrode according to equation (1).<sup>1-3</sup> Note that  $W_p$  was obtained by weighing the polymer mass due to the use of a large electrode (2 cm  $\times$  2 cm) as the working electrode.

$$\eta = [(nFW_p/M)/Q] \times 100\% \quad (1)$$

where,  $n$  is the number of electrons consumed by the reaction of one molecule (here  $n$  is 2),  $F$  is Faraday constant (96,485 C mol<sup>-1</sup>),  $Q$  is the integrated charge passed through the cell during film growth,  $M$  is the molar mass of the monomer.

The mass ( $W$ ) of polymers deposited on the small electrode can be accurately calculated by the equations (2,3).<sup>1-5</sup>

$$W = \frac{(\eta Q_d)(M)}{FZ} \quad (2)$$

$$f = \frac{2Q_0}{\eta Q_d - Q_0} \quad (3)$$

where,  $Z$  is the number of electrons transferred per monomer attached to the polymer, in which  $Z = 2 + f$ .  $f$  is the doping levels of polymer films.  $\eta Q_d$  is the charge used for the polymer film growth and  $Q_0$  is the total charge of oxidized species in the polymer films.

To compare the electrochemical properties of different polymers, the mass of polymer films in this work was controlled as 3.3  $\mu$ g according to the calculated current efficiencies and doping levels (Table S1).

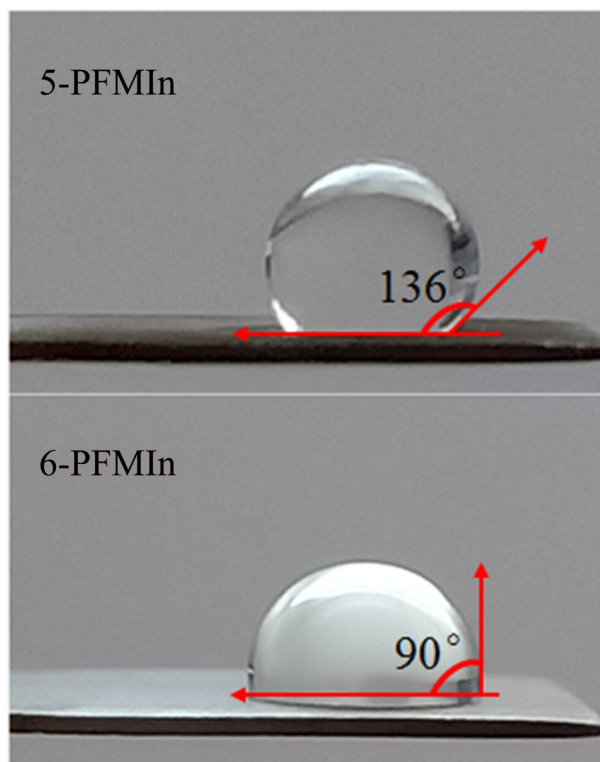

**Figure S1.** Contact angles of 5-PFMIn and 6-PFMIn.

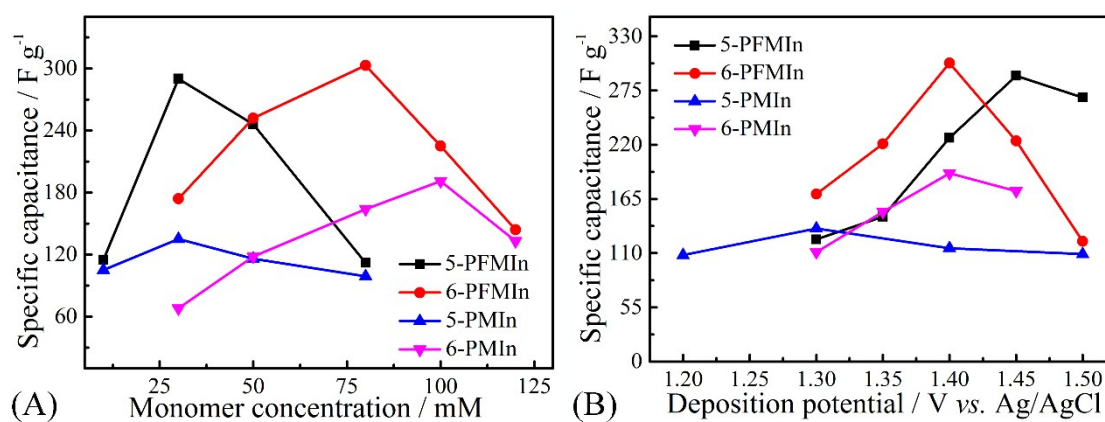

**Figure S2.** Specific capacitance of 5-FMIn, 6-FMIn, 5-MIn and 6-MIn as the function of monomer concentration (A) and deposition potential (B) used to preparation of corresponding polymers.

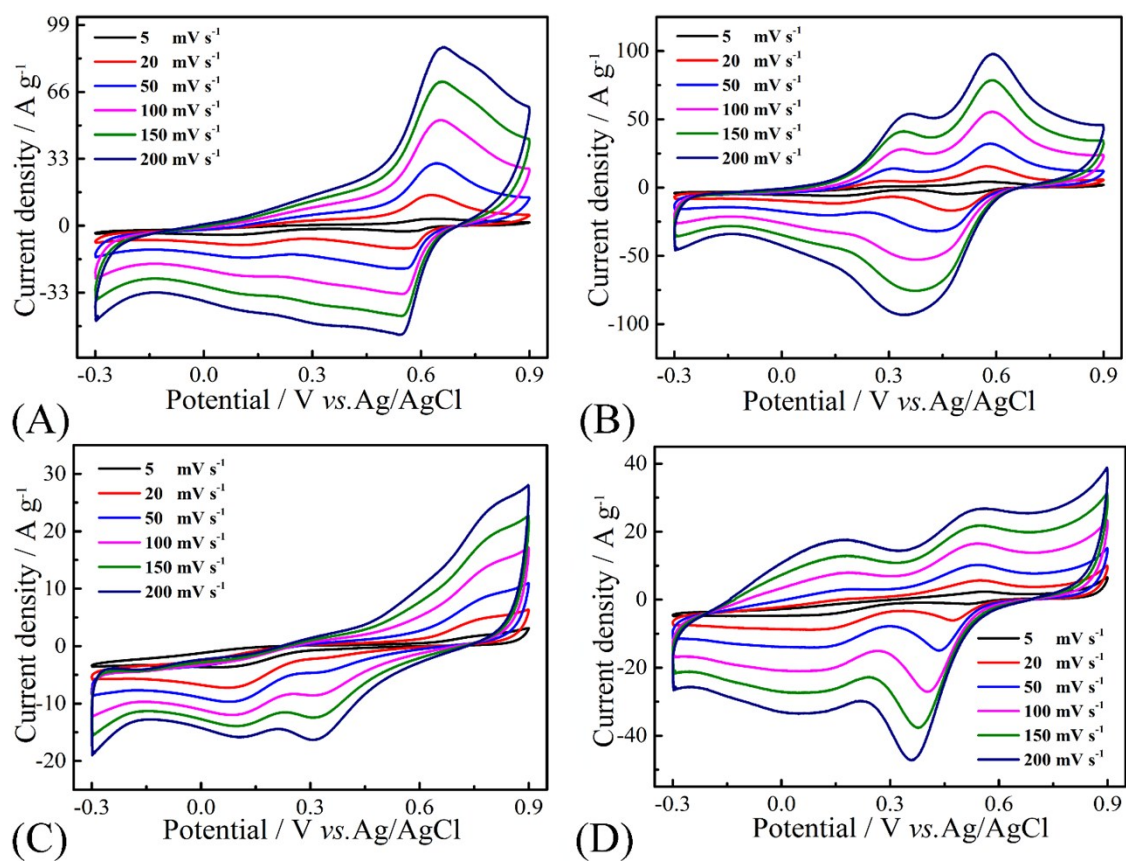

**Figure S3.** Cyclic voltammetry curves of 5-PFMIn (A), 6-PFMIn (B), 5-PMIn (C) and 6-PMIn (D) with various scan rates in the range of 5 to 200 mV s<sup>-1</sup> in 1 M H<sub>2</sub>SO<sub>4</sub> aqueous solution.

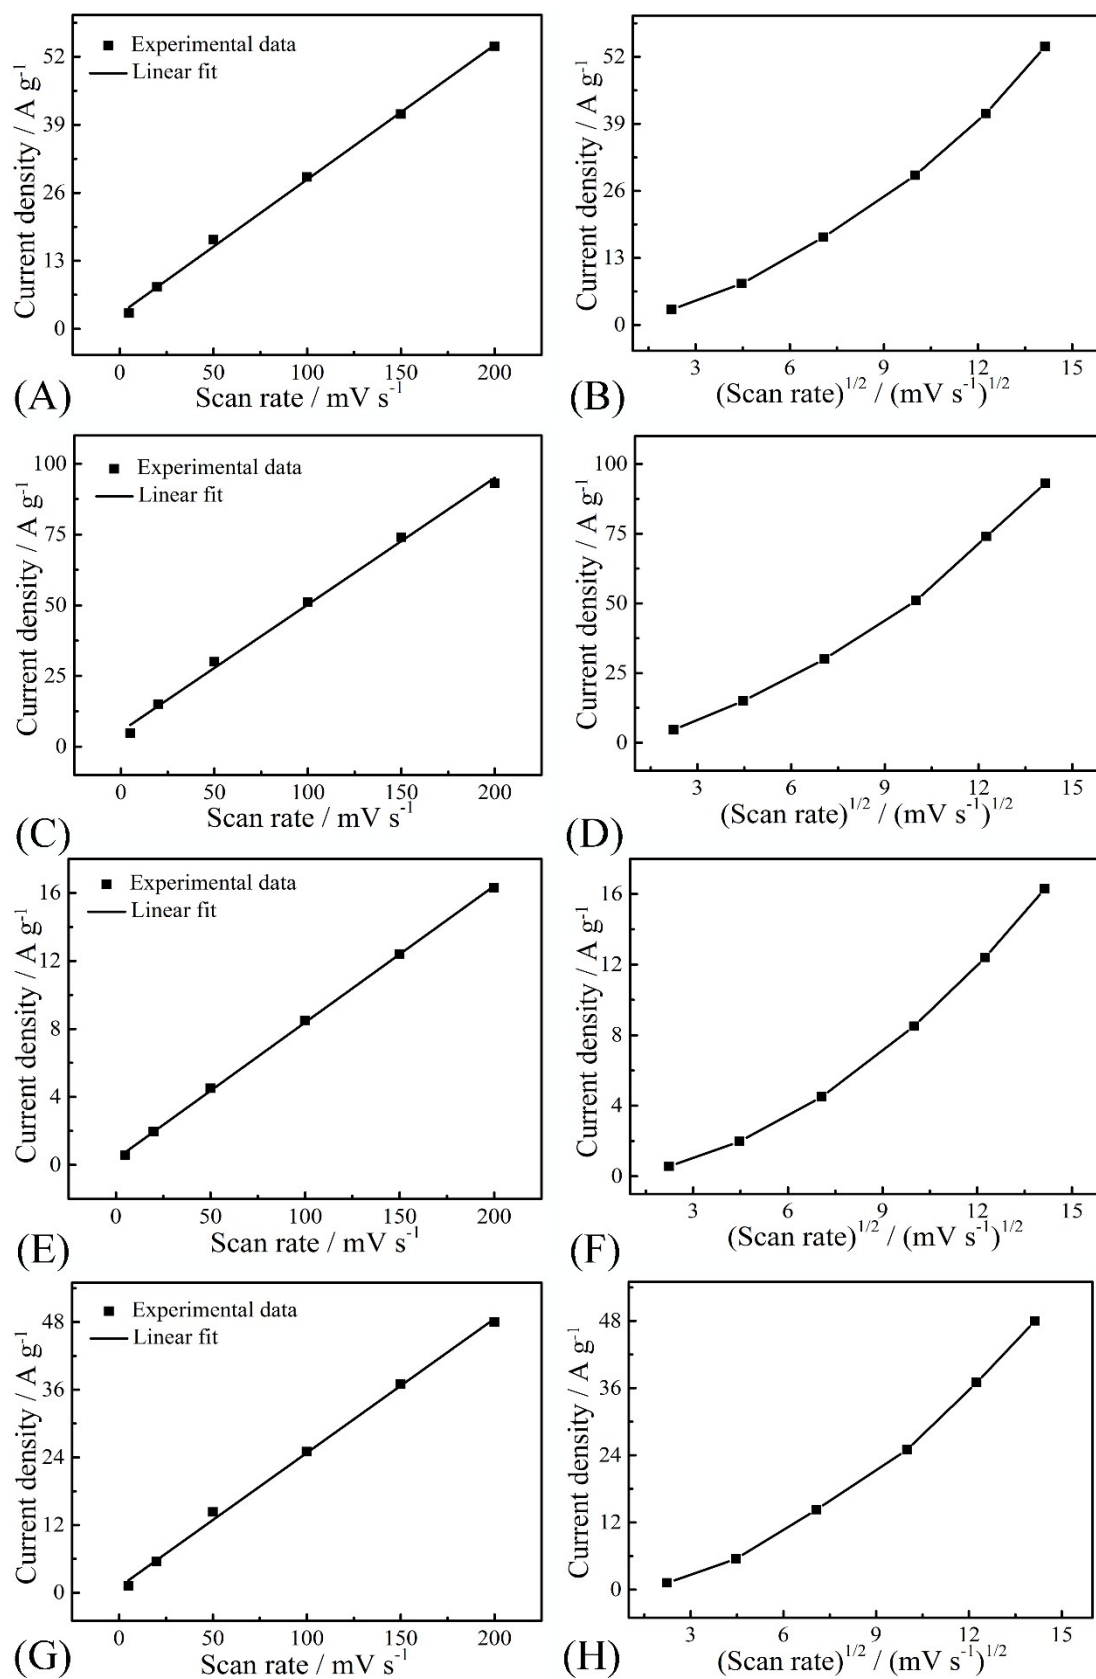

**Figure S4.** Cathodic current as function of scan rate and the square root of scan rate of 5-PFMIIn (A) (B), 6-PFMIIn (C) (D), 5-PMIIn (E) (F) and 6-PMIIn (G) (H).

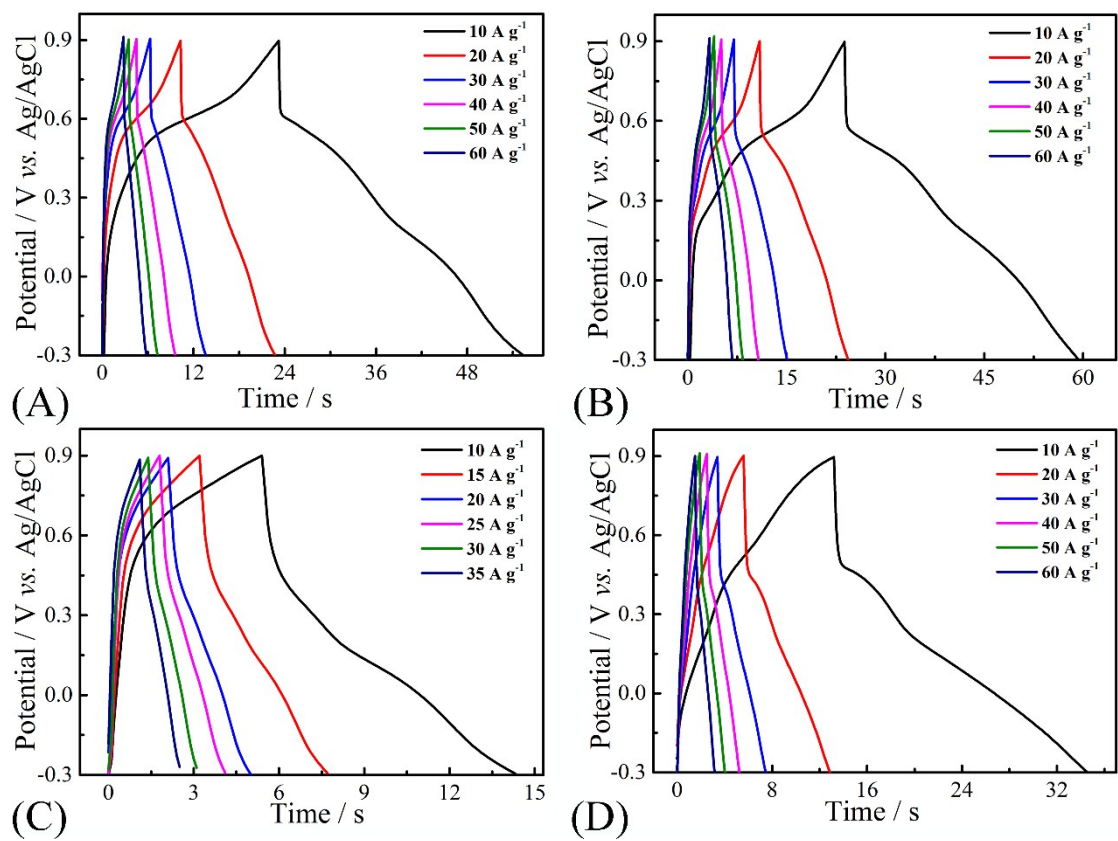

**Figure S5.** Galvanostatic charge/discharge of 5-PFMIIn (A), 6-PFMIIn (B), 5-PMIIn (C) and 6-PMIIn (D) at different current densities in 1 M H<sub>2</sub>SO<sub>4</sub> aqueous solution.

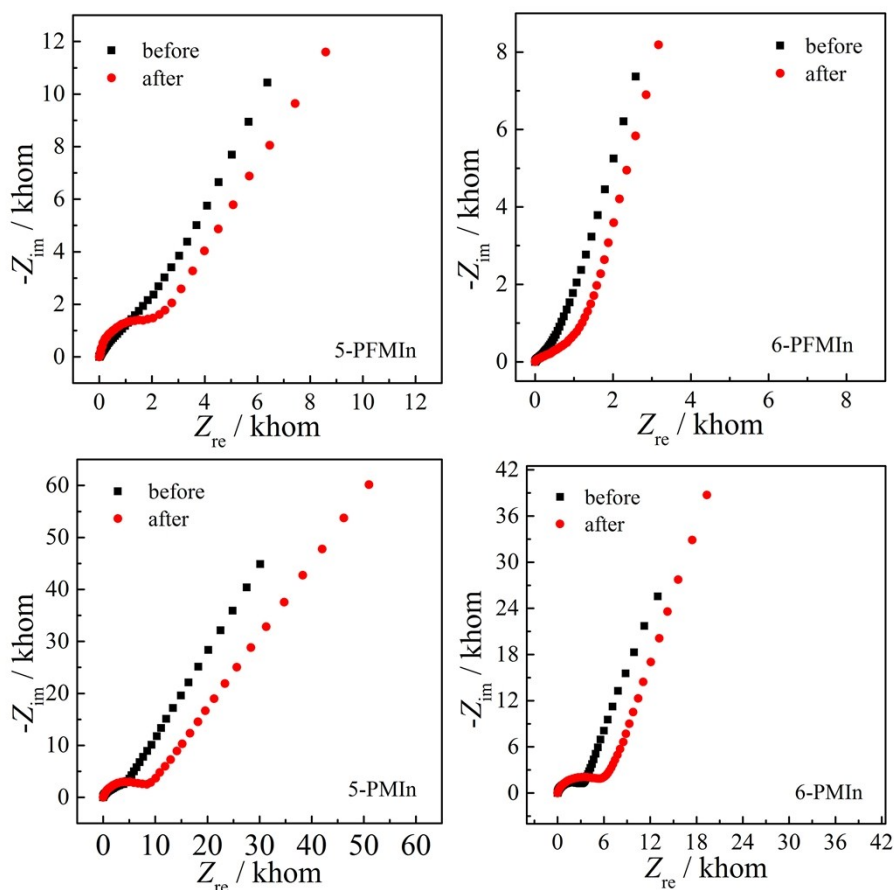

**Figure S6.** Nyquist plots of 5-PFMIIn, 6-PFMIIn, 5-PMIIn and 6-PMIIn before and after the cycling 5000 times in 1 M H<sub>2</sub>SO<sub>4</sub> aqueous solution.

**Table S1** The calculated values for the electropolymerization.

|            | 5-PFMIIn | 6-PFMIIn | 5-PMIIn | 6-PMIIn |
|------------|----------|----------|---------|---------|
| $\eta$ / % | 72       | 75       | 70      | 64      |
| $f$        | 0.14     | 0.18     | 0.18    | 0.12    |

## References

- 1 G. Shi, S. Jin, G Xue and C. Li, *Science* 1995, **267**, 994–996.
- 2 A. E. Kassmi, F. Fache, and M. Lemaire, *J. Electroanal. Chem.* 1994, **373**, 241–244.
- 3 J. Xu, G. Nie, S. Zhang, X. Han, J. Hou and S. Pu, *J. Polym. Sci. Part A Polym.*

*Chem.*, 2005, **43**, 1444–1453.

4 J. Xu, J. Hou, S. Zhang, G. Nie, S. Pu, L. Shen and Q. Xiao, *J. Electroanal. Chem.*, 2005, **578**, 345–355.

5 T. Skotheim and J. Reynolds, *CRC press New York*, 2007.
